# Supplementary material
Source: Research Square preprint supplement (doi:10.21203/rs.3.rs-9292047/v1)
Supplement: Supplementary file 1 [file 09974687d285d2b33ee4baf6.docx]

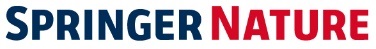
|
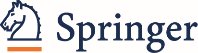


# Consent form for Publication

I Yi-Wei Zhang [Name] give my consent for information about myself/my child or ward/my relative (circle as appropriate) to be published in

[Name of journal] [Biological Trace Element Research](https://link.springer.com/journal/12011)

[Manuscript number] cc8ed72c-3477-4530-8878-e9d48ee08aa9

[Corresponding author] Ya-Hang Liu

NB: In cases where the patient has died or is incapable of giving consent, consent may be given by the next of kin. If the patient is under the age of 16, consent should be given by a parent or guardian.

I understand that the text and any pictures or videos published in the article

1. will be used only in educational publications intended for professionals

Or

1. if the publication or product is published on an open access basis, I understand that it will be freely available on the internet and may be seen by the general public.

The pictures, videos and text may also appear on other websites or in print, may be translated into other languages or used for commercial purposes.

I understand that the information will be published without my/my child or ward’s/my relative’s (circle as appropriate) name attached, but that full anonymity cannot be guaranteed.

I have been offered the opportunity to read the manuscript.

I acknowledge that it is not possible to ensure complete anonymity, and someone may be able to recognize me. However, by signing this consent form I do not in any way give up, waive or remove my rights to privacy. I may revoke my consent at any time before publication, but once the information has been committed to publication (“gone to press”), revocation of the consent is no longer possible.

Name……Yi-Wei Zhang… Date…2026.04.10………… Signed………
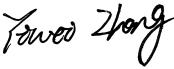
…………

Author name…Heng-Feng Zhang , Rui-Fang Guo, Huan Wang, Cui-Cui Ma, Yan Li, NA An, Ya-Hang Liu Date……2026.04.10……… Signed…
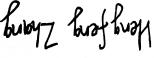

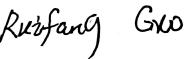

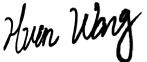

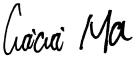

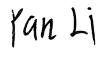

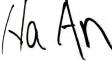

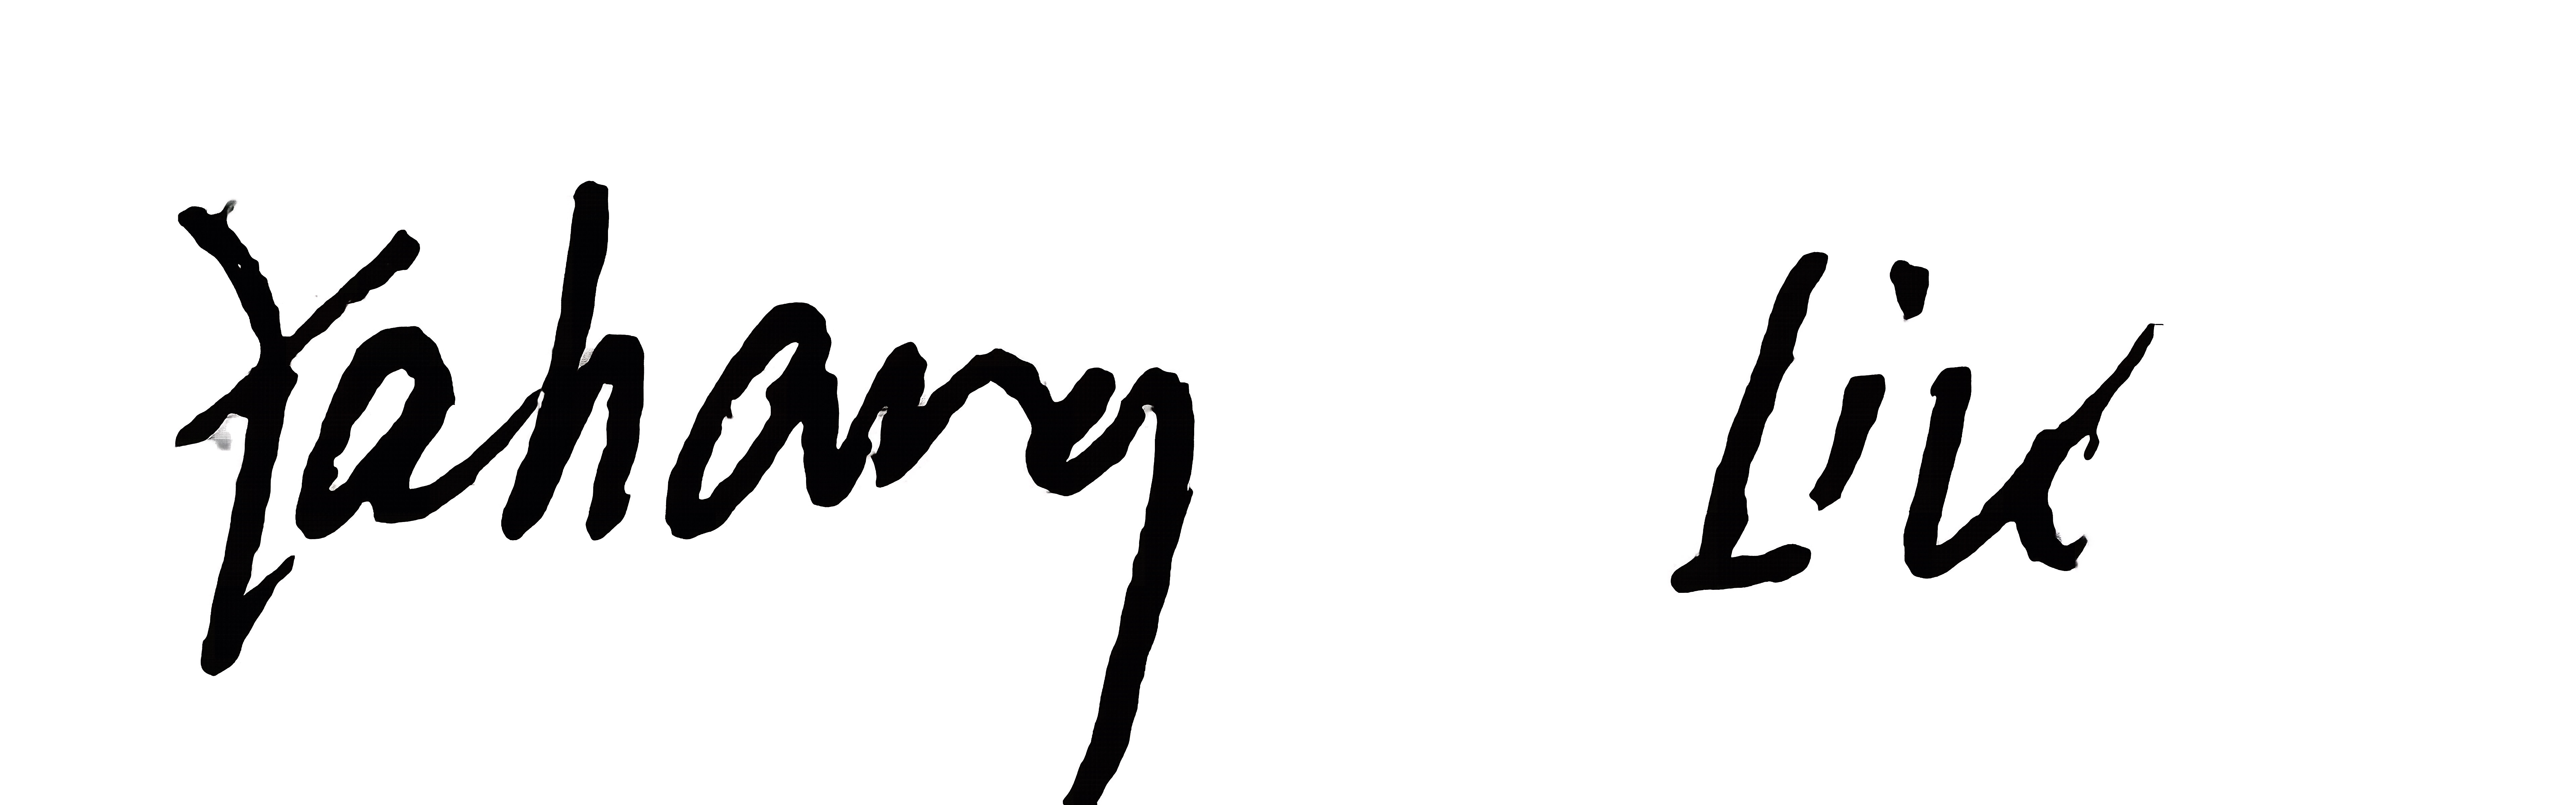


Please keep this consent form in the patient’s case files. The manuscript reporting this patient’s details should state that ‘Written informed consent for publication of their clinical details and/or clinical images was obtained from the patient/parent/guardian/ relative of the patient. A copy of the consent form is available for review by the Editor of this journal.
