# Supplementary material
Source: Research Square preprint supplement (doi:10.21203/rs.3.rs-9292047/v1)
Supplement: Supplementary file 2 [file 22360d349412b0146e761495.docx]

Response to the editor:

We sincerely apologize for an oversight in our manuscript. Upon re-examination, we confirm that whole blood, rather than serum, was used as the specimen. To ensure scientific accuracy, we have corrected all instances of “Serum” to “Blood” throughout the manuscript, including the title. We regret any confusion this may have caused and greatly appreciate your allowance of this correction. No other changes have been made beyond your requested amendments and this factual revision.

Thank you for your understanding.
